# Supplementary material
Source: PubMed Central journal article supplement (PMC8325169)
Supplement: NIHMS1720072-supplement-Supplementary_Tables.pdf [file NIHMS1720072-supplement-Supplementary_Tables.pdf]

## Supplementary Tables

**Table S1: Factors associated with awareness of stroke heritability by country**

| <b>Characteristic</b>           | <b>Nigeria<br/>Adjusted OR(95% CI)</b> | <b>Ghana<br/>Adjusted OR(95% CI)</b> |
|---------------------------------|----------------------------------------|--------------------------------------|
| <b>Age</b>                      |                                        |                                      |
| < 45 years                      | 1.00                                   | 1.00                                 |
| >= 45 years                     | <b>0.68 (0.56-0.83)*</b>               | <b>1.33 (1.06-1.68)*</b>             |
| <b>Gender</b>                   |                                        |                                      |
| Male                            |                                        |                                      |
| Female                          |                                        |                                      |
| <b>Education</b>                |                                        |                                      |
| None                            | 1.00                                   | 1.00                                 |
| Elementary                      | 0.79 (0.63-1.01)                       | 1.25 (0.93-1.69)                     |
| Secondary                       | 0.91 (0.71-1.15)                       | 1.32 (0.99-1.77)                     |
| Post-secondary                  | <b>1.32 (1.05-1.66)*</b>               | <b>1.68 (1.19-2.38)*</b>             |
| <b>Religion</b>                 |                                        |                                      |
| Christianity                    | 1.00                                   | 1.00                                 |
| Islam                           | <b>0.75 (0.64-0.88)*</b>               | 0.95 (0.69-1.29)                     |
| Others                          | 0.98 (0.41-2.32)                       | 0.83 (0.42-1.62)                     |
| <b>Marital status</b>           |                                        |                                      |
| Married                         | 1                                      | 1                                    |
| Not married                     | <b>0.76 (0.63-0.93)*</b>               | 0.88 (0.72-1.08)                     |
| <b>Personal medical history</b> |                                        |                                      |
| High BP                         |                                        |                                      |
| Diabetes mellitus               |                                        |                                      |
| Stroke                          |                                        |                                      |
| Heart disease                   |                                        |                                      |
| Obesity                         |                                        |                                      |
| Family history of stroke        | 1.22 (0.97-1.54)                       | 1.26 (1.02-1.56)*                    |
| <b>Lifestyle/behaviour</b>      |                                        |                                      |
| Smoking                         | 0.73 (0.51-1.03)                       | 1.01 (0.69-1.45)                     |
| Drinking                        | 0.82 (0.66-1.03)                       | 0.78 (0.62-0.97)*                    |

Only variables with p-value<0.1 from crude OR were included to obtain adjusted ORs using logit model

**Table S2: Factors related to willingness to undergo stroke genetic testing by country**

| <b>Characteristic</b>           | <b>Nigeria<br/>Adjusted OR(95% CI)</b> | <b>Ghana<br/>Adjusted OR(95% CI)</b> |
|---------------------------------|----------------------------------------|--------------------------------------|
| <b>Age</b>                      |                                        |                                      |
| < 45 years                      | 1.00                                   | 1.00                                 |
| >= 45 years                     | 0.84 (0.62-1.13)                       | 1.24 (0.78-1.95)                     |
| <b>Gender</b>                   |                                        |                                      |
| Male                            |                                        |                                      |
| Female                          |                                        |                                      |
| <b>Education</b>                |                                        |                                      |
| None                            | 1                                      | 1.00                                 |
| Elementary                      | 1.39 (0.99-1.95)                       | 1.02 (0.59-1.78)                     |
| Secondary                       | 1.24 (0.89-1.72)                       | 1.28 (0.73-2.24)                     |
| Post-secondary                  | <b>1.51 (1.11-2.07)*</b>               | 1.17 (0.60-2.29)                     |
| <b>Religion</b>                 |                                        |                                      |
| Christianity                    | 1.00                                   | 1.00                                 |
| Islam                           | 0.99 (0.78-1.24)                       | 0.86 (0.49-1.54)                     |
| Others                          | 0.66 (0.22-1.99)                       | 0.73 (0.21-2.48)                     |
| <b>Marital status</b>           |                                        |                                      |
| Married                         |                                        |                                      |
| Not married                     |                                        |                                      |
| <b>Personal medical history</b> |                                        |                                      |
| High BP                         | 0.82 (0.66-1.03)                       | 0.87 (0.58-1.28)                     |
| Diabetes mellitus               |                                        |                                      |
| Stroke                          |                                        |                                      |
| Heart disease                   |                                        |                                      |
| Obesity                         | 0.93 (0.45-1.91)                       | 2.39 (0.74-7.73)                     |
| Family history of stroke        | 1.43 (0.99-2.05)                       | 0.88 (0.58-1.33)                     |
| <b>Lifestyle/behaviour</b>      |                                        |                                      |
| Smoking                         |                                        |                                      |
| Drinking                        | 1.12 (0.81-1.54)                       | 1.19 (0.77-1.86)                     |

Only variables with p-value<0.1 from crude OR were included to obtain adjusted ORs using logit model

**Table S3: Factors associated with belief that genetic research will enhance better understanding of stroke : Analysis by country**

|                                 | <b>Nigeria</b>             | <b>Ghana</b>               |
|---------------------------------|----------------------------|----------------------------|
| <b>Characteristic</b>           | <b>Adjusted OR(95% CI)</b> | <b>Adjusted OR(95% CI)</b> |
| <b>Age</b>                      |                            |                            |
| < 45 years                      | 1.00                       | 1.00                       |
| >= 45 years                     | <b>0.66 (0.48-0.92)*</b>   | 1.08 (0.65-1.79)           |
| <b>Gender</b>                   |                            |                            |
| Male                            |                            |                            |
| Female                          |                            |                            |
| <b>Education</b>                |                            |                            |
| None                            | 1.00                       | 1.00                       |
| Elementary                      | 1.36 (0.97-1.91)           | 1.40 (0.81-2.44)           |
| Secondary                       | 1.27 (0.91-1.77)           | <b>1.76 (1.00-3.07)*</b>   |
| Post-secondary                  | <b>1.48 (1.08-2.03)*</b>   | 1.64 (0.82-3.28)           |
| <b>Religion</b>                 |                            |                            |
| Christianity                    | 1.00                       | 1.00                       |
| Islam                           | 0.87 (0.69-1.09)           | 1.00 (0.54-1.86)           |
| Others                          | 0.83 (0.24-2.86)           | 0.49 (0.16-1.47)           |
| <b>Marital status</b>           |                            |                            |
| Married                         |                            |                            |
| Not married                     |                            |                            |
| <b>Personal medical history</b> |                            |                            |
| High BP                         | 0.90 (0.71-1.14)           | 0.83 (0.55-1.25)           |
| Diabetes mellitus               |                            |                            |
| Stroke                          |                            |                            |
| Heart disease                   |                            |                            |
| Obesity                         | 0.97 (0.45-2.06)           | 3.13 (0.75-12.99)          |
| Family history of stroke        | <b>1.48 (1.01-2.16)*</b>   | 0.93 (0.59-2.21)           |
| <b>Lifestyle/behaviour</b>      |                            |                            |
| Smoking                         |                            |                            |
| Drinking                        | 1.19 (0.85-1.66)           | 1.36 (0.84-2.21)           |

Only variables with p-value<0.1 from crude OR were included to obtain adjusted ORs using logit model
